# Supplementary material
Source: publisher site journal article supplement (https://www.dovepress.com/article/406170)
Supplement: Supplementary file 1 [file get_supplementary_file.php]

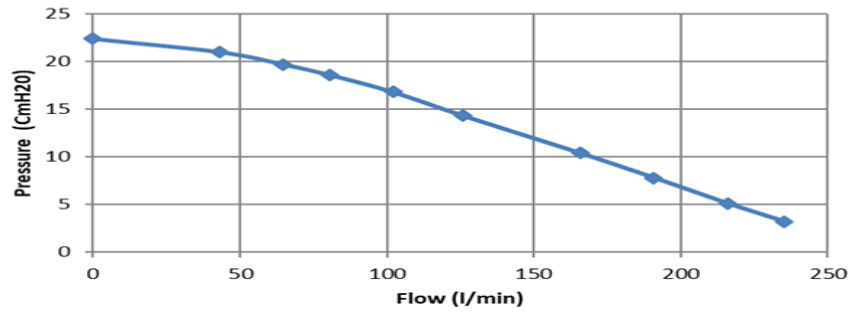

12 V

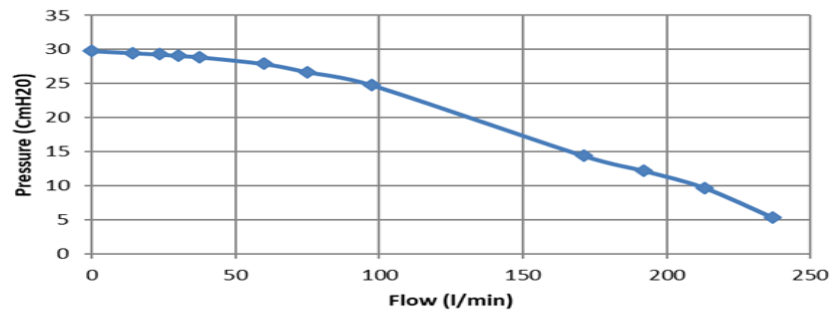

16 V

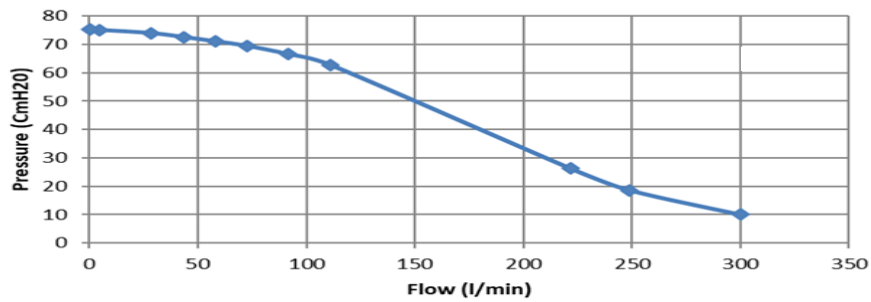

24 V

Figure S11: Pressure-flow (P-V) of the designed centrifugal fan

For 24 V, the P-V, Blower performance exceeded by far the requirements for CPAP application: it can provide more than 50 cmH<sub>2</sub>O for flow up to 145 l/min. Reducing power supply to 16 V; the pressure generated by the blower was higher than 24 cmH<sub>2</sub>O for air flow up to 100 l/min. With a power supply of 12 V, the fan can provide up to 14 cmH<sub>2</sub>O with a flow of 105 l/min which should be enough for most clinical applications of CPAP,

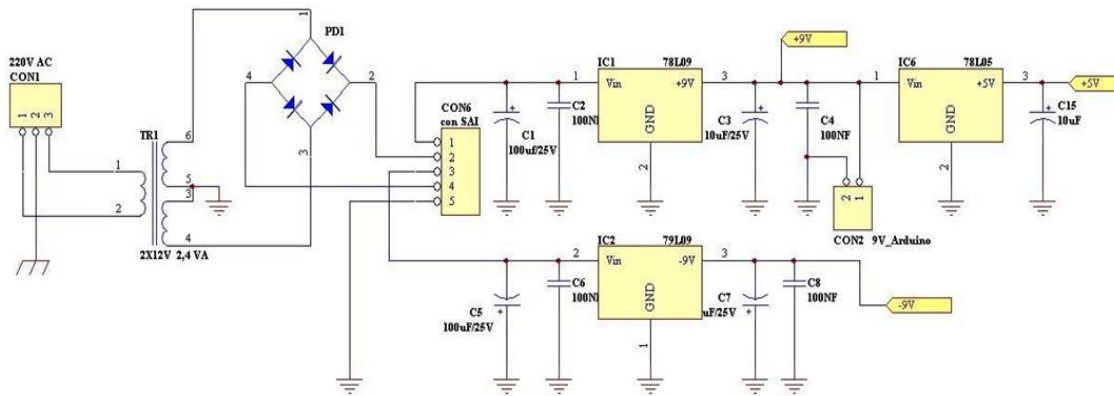

Figure SI2: Circuit of the power supply

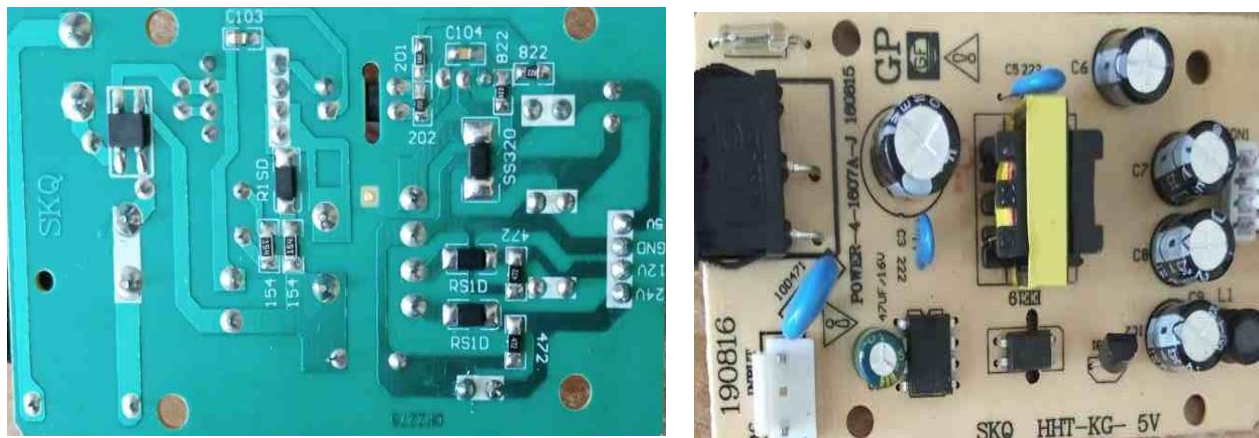

Figure SI3: Circuit of the power supply

Components Used:

| Designator | Value     | Description                   |
|------------|-----------|-------------------------------|
| R6         | 1K2       | Resistor 1/4W 1%              |
| R3         | 1K2       | Resistor 1/4W 1%              |
| R2         | 1K2       | Resistor 1/4W 1%              |
| R1         | 1Mega     | Resistor 1/2W 1%              |
| D1         | 1N4007    | Rectifier diode 1             |
| D2         | 1N4007    | Rectifier diode 1             |
| D3         | 1N4007    | Rectifier diode 1             |
| T1         | 2N2222    | NPN Transistor                |
| C4         | 100µF/25V | Radial electrolytic capacitor |
| C5         | 100µF/25V | Radial electrolytic capacitor |
| C2         | 100µF/25  | Radial electrolytic capacitor |



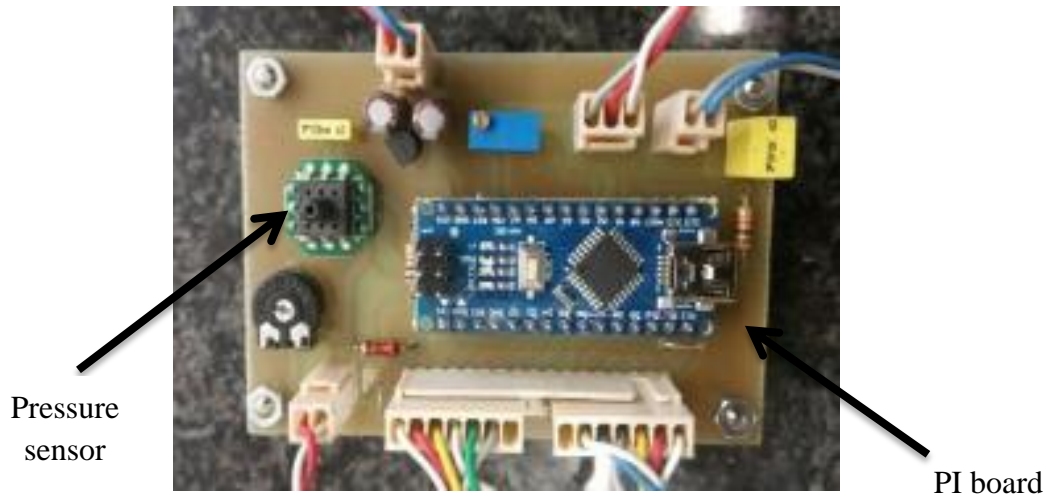

Figure SI5: PCB Circuit of the Proportional-Integral (PI) controller

### Components Used:

| Designator | Value               | Description                    |
|------------|---------------------|--------------------------------|
| R6         | 1K2                 | Resistor 1/4W 1%               |
| R3         | 1K2                 | Resistor 1/4W 1%               |
| R2         | 1K2                 | Resistor 1/4W 1%               |
| R1         | 1Mega               | Resistor 1/2W 1%               |
| D1         | 1N4007              | Rectifier diode 1 <sup>a</sup> |
| D2         | 1N4007              | Rectifier diode 1 <sup>a</sup> |
| D3         | 1N4007              | Rectifier diode 1 <sup>a</sup> |
| T1         | 2N2222              | NPN Transistor                 |
| DZ1        | 4,7V/1W             | Zener Diode                    |
| C4         | 100uF/25V           | Radial electrolytic capacitor  |
| C5         | 100uF/25V           | Radial electrolytic capacitor  |
| C2         | 100uf/25            | Radial electrolytic capacitor  |
| C1         | 680NF/400V          | Axial polypropylene capacitor  |
| C3         | 1000uf/25           | radial electrolytic capacitor  |
| R5         | 220 Ohm             | Resistor 1W 1%                 |
| R4         | 560 Ohm             | Resistor 1/2W 1%               |
| CON2       | Batt12V             | 2 Pin PCB Terminal Block       |
| CON1       | CON 220VAC<br>PANEL | Connector 220V pcb panel       |
| D4         | Diodo 5A            | Rectifier diode 5 <sup>a</sup> |
| CON3       | FA 12V/5A           | 2 Pin PCB Terminal Block       |
| IC1        | H11L2               | Optocoupler                    |
| DL1        | LED Rojo            | LED 5mm                        |

|      |                         |                                         |
|------|-------------------------|-----------------------------------------|
| DL2  | LED Verde               | LED 5mm                                 |
| RL1  | RELAY<br>55.14.09.012   | Relay Finder                            |
| IC2  | TMR3-1222E              | DC/DC converter                         |
| con6 | con 220v out            | 3-pin connector 2,54                    |
| F1   | fuse220v/2A             | 5x20 fuse holder PCB bayonet<br>closure |
| CON4 | To PCB PI<br>controller | 5-pin connector 2,54                    |
| CON5 | To Power blower<br>PCB  | 2 Pin PCB Terminal Block                |
